# Supplementary material for: Mucin Thin Layers: A Model for Mucus-Covered Tissues
Source: Int J Mol Sci. 2019 Jul 29;20(15):3712. doi: 10.3390/ijms20153712 (PMC6695901; doi:10.3390/ijms20153712)
Supplement: Supplementary file 1 [file ijms-20-03712-s001.pdf]

# Mucin thin layers: a model for mucus covered tissues

Valeria Rondelli <sup>1,\*</sup>, Emanuela Di Cola <sup>1</sup>, Alexandros Koutsioubas<sup>2</sup>, Jenny Alongi<sup>3</sup>, Paolo Ferruti<sup>3</sup>, Elisabetta Ranucci <sup>3</sup> and Paola Brocca<sup>1</sup>

<sup>1</sup> Università degli Studi di Milano, department of Medical Biotechnologies and Traslational Medicine; valeria.rondelli@unimi.it

<sup>2</sup> Jülich Centre for Neutron Science (JCNS) at Heinz Maier-Leibnitz Zentrum (MLZ), Forschungszentrum Jülich GmbH, Lichtenbergstrasse 1, 85748 Garching, Germany; a.koutsioumpas@fz-juelich.de

<sup>3</sup> Università degli Studi di Milano, department of Chemistry; elisabetta.ranucci@unimi.it

\* Correspondence: valeria.rondelli@unimi.it; Tel.: +39-0250330323

**Table S1.** Fit parameters of the mucin layer deposited on the silicon surface. Parameters correspond to a contemporary fit performed on H<sub>2</sub>O and D<sub>2</sub>O solutions with 150mM NaCl. Errors have been estimated by changing the parameters up to a variation of two in the  $\chi^2$ .

|       | Thickness<br>( $\pm 1$ Å) | SLD<br>( $\pm 0.05 \cdot 10^{-6} \text{Å}^{-2}$ ) | Solv p<br>( $\pm 5\% \text{vol}$ ) | Roughness<br>( $\pm 2\text{Å}$ ) |
|-------|---------------------------|---------------------------------------------------|------------------------------------|----------------------------------|
| Mucin | 21                        | 2.5 (H <sub>2</sub> O)<br>5.6 (D <sub>2</sub> O)  | 40                                 | 3                                |

**Table S2.** Fit parameters of the mucin layer deposited on the silicon surface, after the interaction with ARGO7-LD. Parameters correspond to a contemporary fit performed on H<sub>2</sub>O and D<sub>2</sub>O solutions with 150mM NaCl. Errors have been estimated by changing the parameters up to a variation of two in the  $\chi^2$ .

|          | Thickness<br>( $\pm 1$ Å) | SLD<br>( $\pm 0.05 \cdot 10^{-6} \text{Å}^{-2}$ ) | Solv p<br>( $\pm 5\% \text{vol}$ ) | Roughness<br>( $\pm 2\text{Å}$ ) |
|----------|---------------------------|---------------------------------------------------|------------------------------------|----------------------------------|
| Mucin    | 21                        | 2.5 (H <sub>2</sub> O)<br>5.6 (D <sub>2</sub> O)  | 45                                 | 2                                |
| ARGO7-LD | 70                        | 2                                                 | 90                                 | 5                                |

**Table S3.** Fit parameters of the mucin layer deposited on the silicon surface, after flushing ARGO7-LD. Parameters correspond to a contemporary fit performed on H<sub>2</sub>O and D<sub>2</sub>O solutions with 150mM NaCl. Errors have been estimated by changing the parameters up to a variation of two in the  $\chi^2$ .

|       | Thickness<br>( $\pm 1$ Å) | SLD<br>( $\pm 0.05 \cdot 10^{-6} \text{Å}^{-2}$ ) | Solv p<br>( $\pm 5\% \text{vol}$ ) | Roughness<br>( $\pm 2\text{Å}$ ) |
|-------|---------------------------|---------------------------------------------------|------------------------------------|----------------------------------|
| Mucin | 20                        | 2.5 (H <sub>2</sub> O)<br>5.6 (D <sub>2</sub> O)  | 50                                 | 2                                |

A)

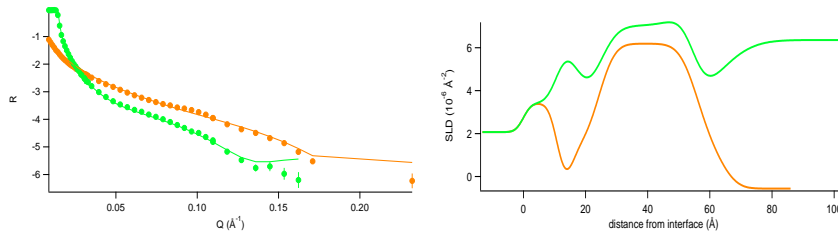

B)

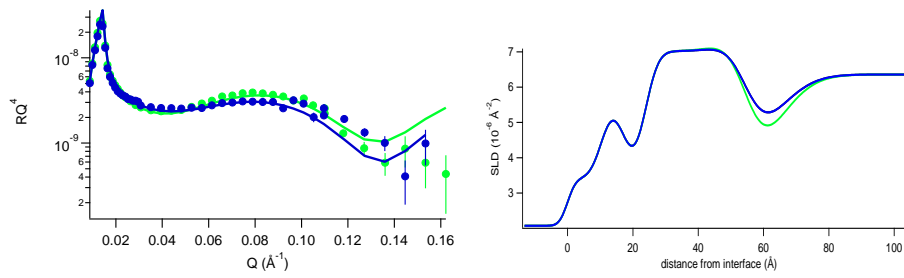

C)

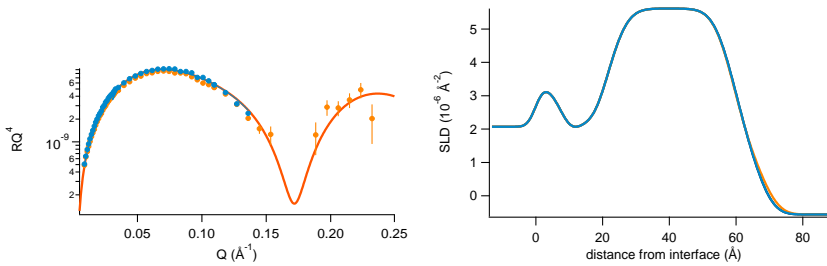

**Figure S1.** Reflectivity curves (left panel, symbols), relative best fits (left panel, lines) and obtained SLD profiles (right panel) of A) the DPPC membrane investigated in H<sub>2</sub>O NaCl (orange), in D<sub>2</sub>O NaCl (green); B) the DPPC membrane D<sub>2</sub>O NaCl investigated before (green) and after (blue) the interaction with mucin; C) the DPPC membrane H<sub>2</sub>O NaCl investigated before (orange) and after (sky blue) the interaction with mucin.

**Table S4.** Fit parameters of the d<sub>62</sub>DPPC membrane at room temperature. Parameters correspond to a contemporary fit performed on H<sub>2</sub>O and D<sub>2</sub>O solutions with 150mM NaCl. Errors have been estimated by changing the parameters up to a variation of two in the  $\chi^2$ . For each parameter, the maximum error found was kept.

|            | Thickness<br>( $\pm 1 \text{ \AA}$ ) | SLD<br>( $\pm 0.05 \cdot 10^{-6} \text{\AA}^{-2}$ ) | Solv p<br>( $\pm 5\% \text{ vol}$ ) | Roughness<br>( $\pm 2 \text{ \AA}$ ) |
|------------|--------------------------------------|-----------------------------------------------------|-------------------------------------|--------------------------------------|
| solvent    | 1                                    |                                                     |                                     | 3                                    |
| Heads in   | 9                                    | 1.75                                                | 32                                  | 4                                    |
| Chains in  | 18                                   | 7.66                                                | 25                                  | 4                                    |
| Chains out | 20                                   | 7.66                                                | 25                                  | 4                                    |
| Heads out  | 10                                   | 1.75                                                | 32                                  | 5                                    |

**Table S5.** Fit parameters of the d<sub>62</sub>DPPC membrane after the interaction with mucin. Parameters correspond to a contemporary fit performed on H<sub>2</sub>O and D<sub>2</sub>O solutions with 150mM NaCl. Errors have been estimated by changing the parameters up to a variation of two in the  $\chi^2$ . For each parameter, the maximum error found was kept.

|            | Thickness<br>( $\pm 1$ Å) | SLD<br>( $\pm 0.05 \cdot 10^{-6} \text{Å}^{-2}$ ) | Solv p<br>( $\pm 5\% \text{vol}$ ) | Roughness<br>( $\pm 2 \text{Å}$ ) |
|------------|---------------------------|---------------------------------------------------|------------------------------------|-----------------------------------|
| solvent    | 1                         |                                                   |                                    | 3                                 |
| Heads in   | 9                         | 1.75                                              | 32                                 | 4                                 |
| Chains in  | 18                        | 7.66                                              | 25                                 | 4                                 |
| Chains out | 20                        | 7.66                                              | 25                                 | 4                                 |
| Heads out  | 8                         | 1.95 (H <sub>2</sub> O)<br>3 (D <sub>2</sub> O)   | 32                                 | 4                                 |

**Table S6.** Fit parameters of the d<sub>62</sub>DPPC-GM1 membrane at room temperature. Parameters correspond to a contemporary fit performed on H<sub>2</sub>O and D<sub>2</sub>O solutions with 150mM NaCl. Errors have been estimated by changing the parameters up to a variation of two in the  $\chi^2$ . For each parameter, the maximum error found was kept.

|            | Thickness<br>( $\pm 1$ Å) | SLD<br>( $\pm 0.05 \cdot 10^{-6} \text{Å}^{-2}$ ) | Solv p<br>( $\pm 5\% \text{vol}$ ) | Roughness<br>( $\pm 2 \text{Å}$ ) |
|------------|---------------------------|---------------------------------------------------|------------------------------------|-----------------------------------|
| solvent    | 5                         |                                                   |                                    | 3                                 |
| Heads in   | 7                         | 1.75                                              | 20                                 | 5                                 |
| Chains in  | 16                        | 7.11                                              | 8                                  | 5                                 |
| Chains out | 17                        | 6.54                                              | 8                                  | 5                                 |
| Heads out  | 6                         | 1.78                                              | 20                                 | 5                                 |

**Table S7.** Fit parameters of the d<sub>62</sub>DPPC-GM1 membrane after the deposition of mucin on top. Parameters correspond to a contemporary fit performed on H<sub>2</sub>O and D<sub>2</sub>O solutions with 150mM NaCl. Errors have been estimated by changing the parameters up to a variation of two in the  $\chi^2$ . For each parameter, the maximum error found was kept.

|            | Thickness<br>( $\pm 1$ Å) | SLD<br>( $\pm 0.05 \cdot 10^{-6} \text{Å}^{-2}$ ) | Solv p<br>( $\pm 5\% \text{vol}$ ) | Roughness<br>( $\pm 2 \text{Å}$ ) |
|------------|---------------------------|---------------------------------------------------|------------------------------------|-----------------------------------|
| solvent    | 0                         |                                                   |                                    | 3                                 |
| Heads in   | 9                         | 1.75                                              | 55                                 | 4                                 |
| Chains in  | 18                        | 7.11                                              | 45                                 | 5                                 |
| Chains out | 18                        | 6.54                                              | 45                                 | 5                                 |
| Heads out  | 10                        | 1.78                                              | 55                                 | 5                                 |
| Mucin      | 22                        | 2.5 (H <sub>2</sub> O)<br>5.6 (D <sub>2</sub> O)  | 63                                 | 7                                 |

**Table S8.** Fit parameters of the d<sub>62</sub>DPPC-GM1 + mucin model system after interaction with ARGO7-LD. Parameters correspond to a contemporary fit performed on H<sub>2</sub>O and D<sub>2</sub>O solutions with 150mM NaCl. Errors have been estimated by changing the parameters up to a variation of two in the  $\chi^2$ . For each parameter, the maximum bar found was kept.

|            | Thickness<br>( $\pm 1$ Å) | SLD<br>( $\pm 0.05 \cdot 10^{-6} \text{Å}^{-2}$ ) | Solv p<br>( $\pm 5\% \text{vol}$ ) | Roughness<br>( $\pm 2 \text{Å}$ ) |
|------------|---------------------------|---------------------------------------------------|------------------------------------|-----------------------------------|
| solvent    | 0                         |                                                   |                                    | 3                                 |
| Heads in   | 9                         | 1.75                                              | 55                                 | 4                                 |
| Chains in  | 18                        | 7.11                                              | 45                                 | 5                                 |
| Chains out | 18                        | 6.54                                              | 45                                 | 5                                 |
| Heads out  | 10                        | 1.78                                              | 55                                 | 5                                 |
| Mucin      | 40                        | 2.5 (H <sub>2</sub> O)<br>5.6 (D <sub>2</sub> O)  | 70                                 | 8                                 |
| ARGO7-LD   | 50                        | 2                                                 | 90                                 | 8                                 |

**Table S9.** Fit parameters of the d<sub>62</sub>DPPC-GM1 + mucin model system after flushing ARGO7-LD. Parameters correspond to a contemporary fit performed on H<sub>2</sub>O and D<sub>2</sub>O solutions with 150mM NaCl. Errors have been estimated by changing the parameters up to a variation of two in the  $\chi^2$ . For each parameter, the maximum bar found was kept.

|            | Thickness<br>( $\pm 1$ Å) | SLD<br>( $\pm 0.05 \cdot 10^{-6} \text{Å}^{-2}$ ) | Solv p<br>( $\pm 5\% \text{vol}$ ) | Roughness<br>( $\pm 2 \text{Å}$ ) |
|------------|---------------------------|---------------------------------------------------|------------------------------------|-----------------------------------|
| solvent    | 0                         |                                                   |                                    | 3                                 |
| Heads in   | 9                         | 1.75                                              | 55                                 | 4                                 |
| Chains in  | 18                        | 7.11                                              | 45                                 | 5                                 |
| Chains out | 18                        | 6.54                                              | 45                                 | 5                                 |
| Heads out  | 10                        | 1.78                                              | 55                                 | 5                                 |
| Mucin      | 25                        | 2.5 (H <sub>2</sub> O)<br>5.6 (D <sub>2</sub> O)  | 80                                 | 8                                 |
